# Supplementary material
Source: Research Square preprint supplement (doi:10.21203/rs.3.rs-9823734/v1)
Supplement: Supplementary file 1 [file ac55d4d1e98357885c225f3e.docx]

**Supporting Information**

Physics-Constrained Symbolic Regression of Collision Integrals for Dilute-Gas Viscosity

Zhuo Li1,2, Yuanyuan Duan1,2[[1]](#footnote-1), Xiaoxian Yang3[[2]](#footnote-2)

1 *Key Laboratory for Thermal Science and Power Engineering of Ministry of Education, Beijing*

2 *Key Laboratory for CO2 Utilization and Reduction Technology, Tsinghua University, Beijing 100084, People’s Republic of China*

3 *Chemnitz University of Technology, Applied Thermodynamics, 09107 Chemnitz, Germany*

**1. List of Tables**

**Table S1** Reference viscosity model in REFPROP 10.0

| Short name | Full name | Viscosity | | | | |
| --- | --- | --- | --- | --- | --- | --- |
| Model | Dilute-gas  model | Potential  parameter | Initial density  dependence | Critical  enhancement |
| 1,3-Butadiene | Buta-1,3-diene | ECS[1] | CI[2]+Chung[3] | Chung[3] | No | No |
| 1-Butyne | But-1-yne | ECS[1] | CI[2]+Chung[3] | Chung[3] | No | No |
| 1-Pentene | Pent-1-ene | ECS[1] | CI[2]+Chung[3] | Chung[3] | No | No |
| 2,2-Dimethylbutane | 2,2-Dimethylbutane | ECS[1] | CI[2]+Chung[3] | Chung[3] | No | No |
| 2,3-Dimethylbutane | 2,3-Dimethylbutane | ECS[1] | CI[2]+Chung[3] | Chung[3] | No | No |
| 3-Methylpentane | 3-Methylpentane | ECS[1] | CI[2]+Chung[3] | Chung[3] | No | No |
| Acetone | Propanone | ECS[1] | CI[2]+Chung[3] | Chung[3] | No | No |
| Acetylene | Ethyne | ECS[1] | CI[2]+Chung[3] | Chung[3] | No | No |
| Ammonia | Ammonia | FS[4] | CS[5] | FS[6] | RF[7] | No |
| Argon | Argon | FS[8] | CI[8] | LJ[9] | No | No |
| Benzene | Benzene | FS[10] | CS[10] | FS[11] | RF[7] | No |
| Butane | n-Butane | FS[12] | CS[12] | C | No | No |
| Butene | 1-Butene | ECS[1] | CI[2]+Chung[3] | Chung[3] | No | No |
| Carbon dioxide | Carbon dioxide | FS[13] | FS[13] | C | RF[7] | LS[14] |
| Carbonmonoxide | Carbonmonoxide | ECS[1] | CI[2]+Chung[3] | Chung[3] | No | No |
| Carbonylsulfide | Carbonoxidesulfide | ECS[1] | CI[2]+Chung[3] | Chung[3] | No | No |
| Chlorine | Chlorine | ECS[1] | CI[2]+Chung[3] | Chung[3] | No | No |
| Chlorobenzene | Chlorobenzene | ECS[1] | CI[2]+Chung[3] | Chung[3] | No | No |
| cis-Butene | cis-2-Butene | ECS[1] | CI[2]+Chung[3] | Chung[3] | No | No |
| Cyclobutene | 1-Cyclobutene | ECS[1] | CI[2]+Chung[3] | Chung[3] | No | No |
| Cyclohexane | Cyclohexane | FS[15] | CS[15,16] | FS[16] | FS[16] | No |
| Cyclopentane | Cyclopentane | ECS[1] | CI[2]+Chung[3] | Chung[3] | No | No |
| Cyclopropane | Cyclopropane | ECS[1] | CI[2]+Chung[3] | Chung[3] | No | No |
| D4 | Octamethylcyclotetrasiloxane | ECS[1] | CI[2]+Chung[3] | Chung[3] | No | No |
| D5 | Decamethylcyclopentasiloxane | ECS[1] | CI[2]+Chung[3] | Chung[3] | No | No |
| D6 | Dodecamethylcyclohexasiloxane | ECS[1] | CI[2]+Chung[3] | Chung[3] | No | No |
| DEA | 2,2’-Iminodiethanol | ECS[1] | CI[2]+Chung[3] | Chung[3] | No | No |
| Decane | Decane | FS[17] | CS[17] | Chung[3] | RF[7] | No |
| Deuterium | Deuterium | FS[18] | CS | FS[19] | FS[19] | No |
| Dichloroethane | 1,2-Dichloroethane | ECS[1] | CI[2]+Chung[3] | Chung[3] | No | No |
| Diethylether | Diethylether | ECS[1] | CI[2]+Chung[3] | Chung[3] | No | No |
| Dimethylcarbonate | Dimethylestercarbonicacid | ECS[1] | CI[2]+Chung[3] | Chung[3] | No | No |
| Dimethylether | Methoxymethane | FS[20] | CS[20] | FS | No | No |
| Docosane | Docosane | ECS[1] | CI[2]+Chung[3] | Chung[3] | No | No |
| Dodecane | Dodecane | FS[21] | CS[5] | Chung[3] | RF[7] | No |
| Ethane | Ethane | FS[22] | FS | C | RF[7] | FS |
| Ethanol | Ethyl alcohol | FS[23] | FS | No | RF[7] | No |
| Ethylene glycol | 1,2-Ethandiol | ECS[1] | CI[2]+Chung[3] | Chung[3] | No | No |
| Ethylbenzene | Phenylethane | FS[24] | CS | No | FS | No |
| Ethylene | Ethene | FS[25] | FS | No | FS | FS |
| Ethyleneoxide | Ethyleneoxide | ECS[1] | CI[2]+Chung[3] | Chung[3] | No | No |
| Fluorine | Fluorine | ECS[1] | CI[2]+Chung[3] | Chung[3] | No | No |
| Heavy water | Deuterium oxide | FS[26] | FS | C | No | B[27] |
| Helium | Helium-4 | FS[28] | FS | No | No | No |
| Heptane | Heptane | FS[29] | CS | FS | RF[30] | No |
| Hexadecane | Hexadecane | FS[31] | CS | NO | FS | No |
| Hexane | Hexane | FS[32] | CS | FS | RF[7] | No |
| Hydrogen(normal) | Hydrogen(normal) | FS[18] | CS | FS[19] | FS[19] | No |
| Hydrogenchloride | Hydrogenchloride | ECS[1] | CI[2]+Chung[3] | Chung[3] | No | No |
| Hydrogensulfide | Hydrogensulfide | FT[33] | FS | C | No | No |
| Isobutane | 2-Methylpropane | FS[34] | CS | FS | FS[35] | No |
| Isobutene | 2-Methyl-1-propene | ECS[1] | CI[2]+Chung[3] | Chung[3] | No | No |
| Isohexane | 2-Methylpentane | ECS[1] | CI[2]+Chung[3] | Chung[3] | No | No |
| Isooctane | 2,2,4-Trimethylpentane | ECS[1] | CI[2]+Chung[3] | Chung[3] | No | No |
| Isopentane | 2-Methylbutane | ECS[1] | CI[2]+Chung[3] | Chung[3] | No | No |
| Krypton | Krypton | ECS[1] | CI[2]+Chung[3] | Chung[3] | No | No |
| MD2M | Decamethyltetrasiloxane | ECS[1] | CI[2]+Chung[3] | Chung[3] | No | No |
| MD3M | Dodecamethylpentasiloxane | ECS[1] | CI[2]+Chung[3] | Chung[3] | No | No |
| MD4M | Tetradecamethylhexasiloxane | ECS[1] | CI[2]+Chung[3] | Chung[3] | No | No |
| MDM | Octamethyltrisiloxane | ECS[1] | CI[2]+Chung[3] | Chung[3] | No | No |
| MEA | Ethanolamine | ECS[1] | CI[2]+Chung[3] | Chung[3] | No | No |
| Methane | Methane | FS[36] | FS | ATM | RF | No |
| Methanol | Methanol | FS[37] | CI[2]+SM[37] | SM | RF | NO |
| Methyllinoleate | Methyl(Z,Z)-9,12-octadecadienate | ECS[1] | CI[2]+Chung[3] | Chung[3] | No | No |
| Methyllinolenate | Methyl(Z,Z,Z)-9,12,15-octadecatrienoate | ECS[1] | CI[2]+Chung[3] | Chung[3] | No | No |
| Methyloleate | Methylcis-9-octadecenoate | ECS[1] | CI[2]+Chung[3] | Chung[3] | No | No |
| Methylpalmitate | Methylhexadecanoate | ECS[1] | CI[2]+Chung[3] | Chung[3] | No | No |
| Methylstearate | Methyloctadecanoate | ECS[1] | CI[2]+Chung[3] | Chung[3] | No | No |
| Methylcyclohexane | Methylcyclohexane | ECS[1] | CI[2]+Chung[3] | Chung[3] | No | No |
| MM | Hexamethyldisiloxane | ECS[1] | CI[2]+Chung[3] | Chung[3] | No | No |
| m-Xylene | 1,3-Dimethylbenzene | FS[38] | CS | No | FS | No |
| Neon | Neon | ECS[1] | CI[2]+Chung[3] | Chung[3] | No | No |
| Neopentane | 2,2-Dimethylpropane | ECS[1] | CI[2]+Chung[3] | Chung[3] | No | No |
| Nitrogen | Nitrogen | FS[8] | CI[8] | FS | No | No |
| Nitrousoxide | Dinitrogenmonoxide | ECS[1] | CI[2]+Chung[3] | Chung[3] | No | No |
| Nonane | Nonane | FS[17] | CS[17] | Chung[3] | RF[7] | No |
| Novec649,1230 | 1,1,1,2,2,4,5,5,5-Nonafluoro-4- | FS | CI[2]+Chung[3] | Chung[3] | RF[7] | No |
| Octane | Octane | FS[17] | CS[17] | Chung[3] | RF[7] | No |
| Oxygen | Oxygen | FS[8] | CI[8] | FS | No | No |
| o-Xylene | 1,2-Dimethylbenzene | FS[39] | CS | No | FS | No |
| Parahydrogen | Parahydrogen | FS[18] | CS | FS[19] | FS[19] | No |
| Pentane | Pentane | ECS[1] | CI[2]+Chung[3] | Chung[3] | No | No |
| Perfluorobutane | Decafluorobutane | ECS[1] | CI[2]+Chung[3] | Chung[3] | No | No |
| Perfluorohexane | Tetradecafluorohexane | ECS[1] | CI[2]+Chung[3] | Chung[3] | No | No |
| Perfluoropentane | Dodecafluoropentane | ECS[1] | CI[2]+Chung[3] | Chung[3] | No | No |
| Propadiene | 1,2-Propadiene | ECS[1] | CI[2]+Chung[3] | Chung[3] | No | No |
| Propane | Propane | FS[40] | FS | C | No | B[27] |
| Propylcyclohexane | n-Propylcyclohexane | ECS[1] | CI[2]+Chung[3] | Chung[3] | No | No |
| Propylene | Propene | ECS[1] | CI[2]+Chung[3] | Chung[3] | No | No |
| Propyleneoxide | 1,2-Epoxypropane | ECS[1] | CI[2]+Chung[3] | Chung[3] | No | No |
| Propyne | Propyne | ECS[1] | CI[2]+Chung[3] | Chung[3] | No | No |
| p-Xylene | 1,4-Dimethylbenzene | FS[41] | CS | No | FS | No |
| R11 | Trichlorofluoromethane | ECS[42] | CI[43] | FS | RF | No |
| R1123 | Trifluoroethylene | ECS[1] | CI[2]+Chung[3] | Chung[3] | No | No |
| R113 | 1,1,2-Trichloro-1,2,2-trifluoroethane | FS | UP | UP | UP | UP |
| R114 | 1,2-Dichloro-1,1,2,2-tetrafluoroethane | ECS[1] | CI[2]+Chung[3] | Chung[3] | No | No |
| R115 | Chloropentafluoroethane | ECS | UP | UP | UP | UP |
| R116 | Hexafluoroethane | FS | UP | UP | UP | UP |
| R12 | Dichlorodifluoromethane | ECS[42] | CI[43] | FS | RF | No |
| R1216 | Hexafluoropropene | ECS[1] | CI[2]+Chung[3] | Chung[3] | No | No |
| R1224yd(Z) | (Z)-1-Chloro-2,3,3,3-tetrafluoropropene | ECS[1] | CI[2]+Chung[3] | Chung[3] | No | No |
| R123 | 2,2-Dichloro-1,1,1-trifluoroethane | FS[44] | FS | No | FS | No |
| R1233zd(E) | trans-1-Chloro-3,3,3-trifluoro-1-propene | ECS[1] | CI[2]+Chung[3] | Chung[3] | No | No |
| R1234yf | 2,3,3,3-Tetrafluoroprop-1-ene | FS[45] | FS | No | RF[7] | No |
| R1234ze(E) | trans-1,3,3,3-Tetrafluoropropene | FS[45] | FS | No | RF[7] | No |
| R1234ze(Z) | cis-1,3,3,3-Tetrafluoropropene | ECS[1] | CI[2]+Chung[3] | Chung[3] | No | No |
| R124 | 1-Chloro-1,2,2,2-tetrafluoroethane | ECS | UP | UP | UP | UP |
| R1243zf | 3,3,3-Trifluoropropene | ECS[1] | CI[2]+Chung[3] | Chung[3] | No | No |
| R125 | Pentafluoroethane | FS[46] | CI[2] | FS | RF |  |
| R13 | Chlorotrifluoromethane | ECS | UP | UP | UP | UP |
| R1336mzz(Z) | (Z)-1,1,1,4,4,4-Hexafluoro-2-butene | ECS[1] | CI[2]+Chung[3] | Chung[3] | No | No |
| R134a | 1,1,1,2-Tetrafluoroethane | FS[47] | CS | FS | RF[7] | NO |
| R13I1 | Trifluoroiodomethane | ECS[1] | CI[2]+Chung[3] | Chung[3] | No | No |
| R14 | Tetrafluoromethane | ECS | UP | UP | UP | UP |
| R141b | 1,1-Dichloro-1-fluoroethane | ECS | UP | UP | UP | UP |
| R142b | 1-Chloro-1,1-difluoroethane | ECS | UP | UP | UP | UP |
| R143a | 1,1,1-Trifluoroethane | ECS[1] | CI[2]+Chung[3] | Chung[3] | No | No |
| R152a | 1,1-Difluoroethane | ECS[42] | CI[43] | FS | RF | No |
| R21 | Dichlorofluoromethane | ECS | UP | UP | UP | UP |
| R218 | Octafluoropropane | ECS[1] | CI[2]+Chung[3] | Chung[3] | No | No |
| R22 | Chlorodifluoromethane | ECS[42] | CI[43] | FS | RF | No |
| R227ea | 1,1,1,2,3,3,3-Heptafluoropropane | ECS224 | UP | UP | UP | UP |
| R23 | Trifluoromethane | FS[48] | CS | FS | RF | NO |
| R236ea | 1,1,1,2,3,3-Hexafluoropropane | ECS[1] | CI[2]+Chung[3] | Chung[3] | No | No |
| R236fa | 1,1,1,3,3,3-Hexafluoropropane | ECS[1] | CI[2]+Chung[3] | Chung[3] | No | No |
| R245ca | 1,1,2,2,3-Pentafluoropropane | ECS[1] | CI[2]+Chung[3] | Chung[3] | No | No |
| R245fa | 1,1,1,3,3-Pentafluoropropane | FS[49] | CS | FS | RF[7] | NO |
| R32 | Difluoromethane | ECS | UP | UP | UP | UP |
| R365mfc | 1,1,1,3,3-Pentafluorobutane | ECS[1] | CI[2]+Chung[3] | Chung[3] | No | No |
| R40 | Methylchloride | ECS[1] | CI[2]+Chung[3] | Chung[3] | No | No |
| R41 | Fluoromethane | ECS[42] | CI[43] | FS | RF | No |
| RC318 | Octafluorocyclobutane | ECS[1] | CI[2]+Chung[3] | Chung[3] | No | No |
| RE143a | Methyltrifluoromethylether | ECS[1] | CI[2]+Chung[3] | Chung[3] | No | No |
| RE245cb2 | Methylpentafluoroethylether | ECS[1] | CI[2]+Chung[3] | Chung[3] | No | No |
| RE245fa2 | 2,2,2-Trifluoroethyl-difluoromethyl-ether | ECS[1] | CI[2]+Chung[3] | Chung[3] | No | No |
| RE347mcc(HFE- | 1,1,1,2,2,3,3-Heptafluoro-3- | ECS[1] | CI[2]+Chung[3] | Chung[3] | No | No |
| Sulfurdioxide | Sulfurdioxide | ECS[1] | CI[2]+Chung[3] | Chung[3] | No | No |
| Sulfurhexafluoride | Sulfurhexafluoride | FT[50] | FS | C | No | No |
| Toluene | Methylbenzene | FS[51] | CS | FS | RF | No |
| trans-Butene | trans-2-Butene | ECS[1] | CI[2]+Chung[3] | Chung[3] | No | No |
| Undecane | Undecane | FS[52] | FS | C | No | No |
| Vinylchloride | Chloroethylene | ECS[1] | CI[2]+Chung[3] | Chung[3] | No | No |
| Water | Water | FS[53] | FS | No | No | FS |
| Xenon | Xenon | ECS[1] | CI[2]+Chung[3] | Chung[3] | No | No |

ECS: Extended Corresponding State. FT: Friction Theory. FS: Fluid Specific. CI: Collision Intrgral. CS: Cross section. UP: Unpublished. LJ: Lonard-Jones potential. C: Critical parameter. ATM: Atmosphere parameters. SM: Stock-Mayer potential. RF: Rainwater-Friend Theory. LS: Luettmer‐Strathmann et al. B: Bhattacharjee et al.

**Table S2** Names, group and constants of pure fluids.

| Fluid name | *M*  (g mol) | *T*c  (K) | *p*c  (MPa) | *ρ*c  (kg/m3) | ω | μ  (Debye) | Group |  | *T*B  (K) | *l*B  (m) | *δ* |
| --- | --- | --- | --- | --- | --- | --- | --- | --- | --- | --- | --- |
| 13BUTADIENE | 54.09 | 425.1 | 4.305 | 245.03 | 0.192 | 0 | 2 | 0 | 987.6772 | 6.45E-10 | 0.0000 |
| 1BUTENE | 56.11 | 419.3 | 4.005 | 237.89 | 0.192 | 0.339 | 4 | 0 | 974.0987 | 6.58E-10 | 0.0548 |
| 1BUTYNE | 54.09 | 432.0 | 4.142 | 251.52 | 0.280 | 0.81 | 4 | 0 | 947.2986 | 6.80E-10 | 0.1264 |
| 1PENTENE | 70.13 | 465.7 | 3.598 | 241.96 | 0.233 | 0.51 | 4 | 0 | 1052.348 | 7.18E-10 | 0.0696 |
| 22DIMETHYLBUTANE | 86.18 | 490.0 | 3.138 | 239.57 | 0.230 | 0 | 2 | 0 | 1109.356 | 7.63E-10 | 0.0000 |
| 23DIMETHYLBUTANE | 86.18 | 500.6 | 3.161 | 241.29 | 0.247 | 0 | 2 | 0 | 1120.826 | 7.72E-10 | 0.0000 |
| 3METHYLPENTANE | 86.18 | 506.0 | 3.185 | 239.57 | 0.268 | 0 | 2 | 0 | 1117.861 | 7.79E-10 | 0.0000 |
| ACETONE | 58.08 | 508.1 | 4.692 | 272.97 | 0.307 | 2.88 | 4 | 0 | 1097.655 | 6.97E-10 | 0.4021 |
| ACETYLENE | 26.04 | 308.3 | 5.988 | 229.91 | 0.178 | 0 | 3 | 0 | 723.3465 | 5.16E-10 | 0.0000 |
| AMMONIA | 17.03 | 405.6 | 11.363 | 233.25 | 0.256 | 1.47 | 7 | 0 | 903.6897 | 4.72E-10 | 0.4060 |
| ARGON | 39.95 | 150.7 | 4.863 | 535.60 | -0.00219 | 0 | 0 | 0 | 409.4894 | 4.03E-10 | 0.0000 |
| BENZENE | 78.11 | 562.0 | 4.907 | 304.71 | 0.211 | 0 | 2 | 0 | 1288.721 | 6.83E-10 | 0.0000 |
| BUTANE | 58.12 | 425.1 | 3.796 | 228.00 | 0.201 | 0.05 | 4 | 0 | 981.5102 | 6.75E-10 | 0.0077 |
| C11 | 156.31 | 638.8 | 1.990 | 236.79 | 0.539 | 0 | 2 | 0 | 1223.071 | 1.08E-09 | 0.0000 |
| C12 | 170.33 | 658.1 | 1.817 | 226.55 | 0.574 | 0 | 2 | 0 | 1241.086 | 1.14E-09 | 0.0000 |
| C16 | 226.44 | 722.1 | 1.480 | 226.44 | 0.749 | 0 | 2 | 0 | 1273.736 | 1.33E-09 | 0.0000 |
| C1CC6 | 98.19 | 572.2 | 3.470 | 267.07 | 0.234 | 0 | 2 | 0 | 1292.042 | 7.78E-10 | 0.0000 |
| C22 | 310.60 | 792.2 | 1.174 | 224.56 | 0.978 | 0 | 2 | 0 | 1303.756 | 1.58E-09 | 0.0000 |
| C2BUTENE | 56.11 | 435.8 | 4.226 | 238.12 | 0.202 | 0.3 | 4 | 0 | 1005.349 | 6.57E-10 | 0.0478 |
| C3CC6 | 126.24 | 630.8 | 2.860 | 260.05 | 0.326 | 0 | 2 | 0 | 1345.602 | 8.88E-10 | 0.0000 |
| C4F10 | 238.03 | 386.3 | 2.322 | 627.68 | 0.372 | 0 | 3 | 0 | 803.0137 | 8.21E-10 | 0.0000 |
| C5F12 | 288.03 | 421.0 | 2.063 | 625.03 | 0.436 | 0 | 3 | 0 | 846.2007 | 8.99E-10 | 0.0000 |
| C6F14 | 338.04 | 448.0 | 1.742 | 616.93 | 0.497 | 0 | 3 | 0 | 874.264 | 9.92E-10 | 0.0000 |
| CF3I | 195.91 | 396.4 | 3.953 | 868.00 | 0.176 | 0.92 | 5 | 0 | 931.4755 | 6.44E-10 | 0.1569 |
| CHLORINE | 70.91 | 416.9 | 7.642 | 571.50 | 0.070 | 0 | 1 | 0 | 1062.944 | 5.03E-10 | 0.0000 |
| CHLOROBENZENE | 112.56 | 632.4 | 4.521 | 364.68 | 0.253 | 1.69 | 6 | 0 | 1410.19 | 7.42E-10 | 0.1895 |
| CO | 28.01 | 132.9 | 3.494 | 303.91 | 0.050 | 0.1 | 5 | 0 | 344.6478 | 4.42E-10 | 0.0494 |
| CO2 | 44.01 | 304.1 | 7.377 | 467.60 | 0.224 | 0 | 3 | 0 | 714.4889 | 4.71E-10 | 0.0000 |
| COS | 60.08 | 378.8 | 6.370 | 445.16 | 0.098 | 0.7152 | 5 | 0 | 944.1623 | 5.24E-10 | 0.1652 |
| CYCLOBUTENE | 54.09 | 448.0 | 5.150 | 279.65 | 0.163 | 0.136 | 4 | 0 | 1062.521 | 6.11E-10 | 0.0235 |
| CYCLOHEX | 84.16 | 553.6 | 4.081 | 271.33 | 0.210 | 0.3 | 4 | 0 | 1270.623 | 7.22E-10 | 0.0369 |
| CYCLOPEN | 70.13 | 511.7 | 4.583 | 274.92 | 0.202 | 0 | 2 | 0 | 1180.624 | 6.75E-10 | 0.0000 |
| CYCLOPRO | 42.08 | 398.3 | 5.580 | 258.50 | 0.131 | 0 | 2 | 0 | 967.7816 | 5.65E-10 | 0.0000 |
| D2 | 4.03 | 38.3 | 1.680 | 69.41 | -0.136 | 0 | 8 | 1.223 | 126.3513 | 3.39E-10 | 0.0000 |
| D2O | 20.03 | 643.8 | 21.662 | 356.00 | 0.364 | 1.9 | 7 | 0 | 1514.054 | 4.12E-10 | 0.4973 |
| DECANE | 142.28 | 617.7 | 2.103 | 233.34 | 0.488 | 0.07 | 4 | 0 | 1210.295 | 1.03E-09 | 0.0052 |
| DEE | 74.12 | 466.7 | 3.720 | 264.00 | 0.290 | 1.151 | 6 | 0 | 1017.169 | 7.26E-10 | 0.1571 |
| DMC | 90.08 | 557.0 | 4.909 | 360.31 | 0.346 | 0.899 | 5 | 0 | 1174.661 | 7.16E-10 | 0.1164 |
| DME | 46.07 | 400.4 | 5.337 | 273.65 | 0.196 | 1.301 | 4 | 0 | 927.8435 | 5.90E-10 | 0.2537 |
| EBENZENE | 106.17 | 617.1 | 3.622 | 291.00 | 0.305 | 0.6 | 4 | 0 | 1332.805 | 8.08E-10 | 0.0609 |
| EGLYCOL | 62.07 | 719.0 | 10.509 | 364.96 | 0.619 | 2.41 | 7 | 0 | 1226.851 | 6.28E-10 | 0.3717 |
| ETHANE | 30.07 | 305.3 | 4.872 | 206.18 | 0.100 | 0 | 2 | 0 | 760.017 | 5.33E-10 | 0.0000 |
| ETHANOL | 46.07 | 514.7 | 6.268 | 273.19 | 0.646 | 1.6909 | 7 | 0 | 903.2969 | 6.92E-10 | 0.2631 |
| ETHYLENE | 28.05 | 282.4 | 5.042 | 214.25 | 0.087 | 0 | 3 | 0 | 710.1755 | 5.11E-10 | 0.0000 |
| ETHYLENEOXIDE | 44.05 | 468.9 | 3.705 | 315.86 | 0.210 | 1.89 | 6 | 0 | 1076.335 | 7.06E-10 | 0.2613 |
| FLUORINE | 38.00 | 144.4 | 5.172 | 592.86 | 0.045 | 0 | 1 | 0 | 376.1751 | 3.98E-10 | 0.0000 |
| H2S | 34.08 | 373.1 | 9.000 | 347.28 | 0.101 | 0.97 | 6 | 0 | 928.2172 | 4.65E-10 | 0.2700 |
| HCL | 36.46 | 324.7 | 8.314 | 432.79 | 0.129 | 1.079 | 6 | 0 | 789.8379 | 4.61E-10 | 0.3296 |
| HELIUM | 4.00 | 5.2 | 0.228 | 69.58 | -0.384 | 0 | 8 | 2.67 | 22.58657 | 3.11E-10 | 0.0000 |
| HEPTANE | 100.20 | 540.2 | 2.736 | 233.47 | 0.349 | 0.07 | 4 | 0 | 1137.277 | 8.63E-10 | 0.0070 |
| HEXANE | 86.18 | 507.8 | 3.044 | 233.19 | 0.300 | 0.07 | 4 | 0 | 1100.037 | 8.01E-10 | 0.0079 |
| HYDROGEN | 2.02 | 33.1 | 1.296 | 31.26 | -0.219 | 0 | 8 | 1.729 | 119.6569 | 3.42E-10 | 0.0000 |
| IBUTENE | 56.11 | 418.1 | 4.010 | 233.96 | 0.193 | 0.5 | 4 | 0 | 970.6364 | 6.57E-10 | 0.0811 |
| IHEXANE | 86.18 | 497.7 | 3.040 | 233.97 | 0.280 | 0 | 2 | 0 | 1091.54 | 7.90E-10 | 0.0000 |
| IOCTANE | 114.23 | 544.0 | 2.572 | 242.16 | 0.303 | 0 | 2 | 0 | 1176.291 | 8.68E-10 | 0.0000 |
| IPENTANE | 72.15 | 460.4 | 3.378 | 236.00 | 0.227 | 0.11 | 4 | 0 | 1044.026 | 7.28E-10 | 0.0147 |
| ISOBUTAN | 58.12 | 407.8 | 3.629 | 225.50 | 0.184 | 0.132 | 4 | 0 | 952.7612 | 6.71E-10 | 0.0209 |
| KRYPTON | 83.80 | 209.5 | 5.525 | 909.21 | -0.001 | 0 | 0 | 0 | 568.5714 | 4.31E-10 | 0.0000 |
| MEA | 61.08 | 671.4 | 8.125 | 329.24 | 0.573 | 2.3699 | 7 | 0 | 1291.385 | 7.06E-10 | 0.2989 |
| METHANE | 16.04 | 190.6 | 4.599 | 162.66 | 0.011 | 0 | 2 | 0 | 511.3914 | 4.47E-10 | 0.0000 |
| METHANOL | 32.04 | 512.6 | 8.104 | 275.56 | 0.563 | 1.7 | 7 | 0 | 918.3994 | 6.11E-10 | 0.3161 |
| MM | 162.38 | 518.7 | 1.931 | 268.41 | 0.418 | 0.801 | 4 | 0 | 1052.175 | 9.79E-10 | 0.0686 |
| MXYLENE | 106.17 | 616.9 | 3.535 | 282.93 | 0.326 | 0.3 | 4 | 0 | 1315.93 | 8.21E-10 | 0.0299 |
| N2O | 44.01 | 309.5 | 7.245 | 452.01 | 0.162 | 0.1608 | 5 | 0 | 734.6225 | 4.82E-10 | 0.0477 |
| NEON | 20.18 | 44.4 | 2.662 | 486.31 | -0.036 | 0 | 8 | 0.593 | 131.7541 | 3.17E-10 | 0.0000 |
| NEOPENTN | 72.15 | 433.7 | 3.196 | 235.93 | 0.196 | 0 | 2 | 0 | 1004.798 | 7.18E-10 | 0.0000 |
| NF3 | 71.02 | 234.0 | 4.461 | 562.47 | 0.126 | 0.235 | 5 | 0 | 570.5286 | 5.08E-10 | 0.0730 |
| NITROGEN | 28.01 | 126.2 | 3.396 | 313.30 | 0.037 | 0 | 1 | 0 | 330.9233 | 4.36E-10 | 0.0000 |
| NONANE | 128.26 | 594.6 | 2.281 | 232.14 | 0.443 | 0.07 | 4 | 0 | 1190.671 | 9.78E-10 | 0.0056 |
| NOVEC649 | 316.04 | 441.8 | 1.869 | 606.81 | 0.471 | 0.43 | 5 | 0 | 872.8639 | 9.56E-10 | 0.0419 |
| OCTANE | 114.23 | 568.7 | 2.484 | 232.00 | 0.398 | 0.07 | 4 | 0 | 1165.775 | 9.22E-10 | 0.0062 |
| ORTHOHYD | 2.02 | 33.2 | 1.311 | 31.14 | -0.218 | 0 | 8 | 1.729 | 119.9276 | 3.41E-10 | 0.0000 |
| OXYGEN | 32.00 | 154.6 | 5.043 | 436.14 | 0.022 | 0 | 1 | 0 | 410.8004 | 4.06E-10 | 0.0000 |
| OXYLENE | 106.17 | 630.3 | 3.738 | 285.00 | 0.312 | 0.63 | 4 | 0 | 1355.529 | 8.07E-10 | 0.0635 |
| PARAHYD | 2.02 | 32.9 | 1.286 | 31.32 | -0.219 | 0 | 8 | 1.729 | 118.9096 | 3.42E-10 | 0.0000 |
| PENTANE | 72.15 | 469.7 | 3.368 | 231.60 | 0.251 | 0.07 | 4 | 0 | 1048.934 | 7.41E-10 | 0.0091 |
| PROPADIENE | 40.06 | 398.0 | 5.216 | 236.38 | 0.115 | 0.2 | 4 | 0 | 978.6769 | 5.73E-10 | 0.0396 |
| PROPANE | 44.10 | 369.9 | 4.251 | 220.48 | 0.152 | 0.084 | 4 | 0 | 884.3032 | 6.08E-10 | 0.0160 |
| PROPYLEN | 42.08 | 364.2 | 4.555 | 229.63 | 0.146 | 0.366 | 4 | 0 | 874.6774 | 5.90E-10 | 0.0735 |
| PROPYLENEOXIDE | 58.08 | 488.1 | 5.437 | 299.40 | 0.249 | 2 | 6 | 0 | 1092.261 | 6.40E-10 | 0.3182 |
| PROPYNE | 40.06 | 402.4 | 5.626 | 244.92 | 0.204 | 0.781 | 4 | 0 | 927.1257 | 5.82E-10 | 0.1554 |
| PXYLENE | 106.17 | 616.2 | 3.532 | 286.00 | 0.324 | 0 | 2 | 0 | 1315.919 | 8.20E-10 | 0.0000 |
| R11 | 137.37 | 471.1 | 4.408 | 554.00 | 0.189 | 0.45 | 5 | 0 | 1096.977 | 6.61E-10 | 0.0680 |
| R1123 | 82.02 | 331.7 | 4.543 | 492.15 | 0.261 | 1.4 | 6 | 0 | 736.1449 | 5.99E-10 | 0.2993 |
| R113 | 187.38 | 487.2 | 3.392 | 560.00 | 0.253 | 0.803 | 5 | 0 | 1086.971 | 7.48E-10 | 0.1012 |
| R114 | 170.92 | 418.8 | 3.257 | 579.97 | 0.252 | 0.658 | 5 | 0 | 934.5517 | 7.21E-10 | 0.0946 |
| R115 | 154.47 | 353.1 | 3.129 | 614.78 | 0.248 | 0.52 | 5 | 0 | 790.0686 | 6.89E-10 | 0.0870 |
| R116 | 138.01 | 293.0 | 3.048 | 613.32 | 0.257 | 0 | 3 | 0 | 652.0527 | 6.56E-10 | 0.0000 |
| R12 | 120.91 | 385.1 | 4.136 | 565.00 | 0.179 | 0.51 | 5 | 0 | 902.6351 | 6.29E-10 | 0.0915 |
| R1216 | 150.02 | 358.9 | 3.150 | 583.41 | 0.333 | 1.088 | 6 | 0 | 762.5116 | 7.14E-10 | 0.1757 |
| R1224YDZ | 148.49 | 428.7 | 3.337 | 527.13 | 0.322 | 1.47 | 6 | 0 | 916.6192 | 7.40E-10 | 0.2052 |
| R123 | 152.93 | 456.8 | 3.662 | 550.00 | 0.282 | 1.356 | 6 | 0 | 1000.549 | 7.22E-10 | 0.1880 |
| R1233ZDE | 130.50 | 439.6 | 3.624 | 480.23 | 0.303 | 1.12 | 6 | 0 | 950.839 | 7.21E-10 | 0.1597 |
| R1234YF | 114.04 | 367.9 | 3.382 | 475.55 | 0.276 | 2.48 | 6 | 0 | 808.9034 | 6.89E-10 | 0.4106 |
| R1234ZEE | 114.04 | 382.5 | 3.635 | 489.24 | 0.313 | 1.27 | 6 | 0 | 822.2194 | 6.90E-10 | 0.2078 |
| R1234ZEZ | 114.04 | 423.3 | 3.531 | 456.17 | 0.327 | 2.9 | 6 | 0 | 902.9774 | 7.25E-10 | 0.4204 |
| R124 | 136.48 | 395.4 | 3.624 | 560.00 | 0.288 | 1.469 | 6 | 0 | 862.7938 | 6.92E-10 | 0.2337 |
| R1243ZF | 96.05 | 376.9 | 3.518 | 413.02 | 0.260 | 2.43 | 6 | 0 | 836.9415 | 6.81E-10 | 0.4021 |
| R125 | 120.02 | 339.2 | 3.618 | 573.58 | 0.305 | 1.563 | 6 | 0 | 732.4701 | 6.62E-10 | 0.2883 |
| R13 | 104.46 | 302.0 | 3.879 | 582.88 | 0.172 | 0.51 | 5 | 0 | 711.4582 | 5.91E-10 | 0.1132 |
| R1336MZZZ | 164.06 | 444.5 | 2.903 | 499.39 | 0.386 | 2.92 | 6 | 0 | 917.111 | 8.03E-10 | 0.3605 |
| R134A | 102.03 | 374.2 | 4.059 | 511.90 | 0.327 | 2.058 | 6 | 0 | 797.974 | 6.64E-10 | 0.3624 |
| R14 | 88.00 | 227.5 | 3.750 | 625.70 | 0.179 | 0 | 3 | 0 | 533.6038 | 5.45E-10 | 0.0000 |
| R141B | 116.95 | 477.5 | 4.212 | 458.56 | 0.220 | 2.014 | 6 | 0 | 1088.695 | 6.83E-10 | 0.2911 |
| R142B | 100.50 | 410.3 | 4.055 | 446.00 | 0.232 | 2.14 | 6 | 0 | 927.6116 | 6.61E-10 | 0.3520 |
| R143A | 84.04 | 345.9 | 3.761 | 431.00 | 0.262 | 2.34 | 6 | 0 | 767.7601 | 6.48E-10 | 0.4357 |
| R150 | 98.96 | 561.6 | 5.226 | 428.49 | 0.268 | 1.44 | 6 | 0 | 1240.712 | 6.83E-10 | 0.1947 |
| R152A | 66.05 | 386.4 | 4.517 | 368.00 | 0.275 | 2.262 | 6 | 0 | 850.1487 | 6.36E-10 | 0.4121 |
| R161 | 48.06 | 375.3 | 5.046 | 302.00 | 0.220 | 1.9397 | 6 | 0 | 855.3738 | 5.94E-10 | 0.3903 |
| R21 | 102.92 | 451.5 | 5.181 | 526.00 | 0.206 | 1.37 | 6 | 0 | 1038.737 | 6.22E-10 | 0.2331 |
| R218 | 188.02 | 345.0 | 2.640 | 627.98 | 0.317 | 0 | 3 | 0 | 739.7785 | 7.43E-10 | 0.0000 |
| R22 | 86.47 | 369.3 | 4.990 | 523.84 | 0.221 | 1.458 | 6 | 0 | 841.2452 | 5.93E-10 | 0.2965 |
| R227EA | 170.03 | 374.9 | 2.925 | 594.25 | 0.357 | 1.456 | 6 | 0 | 785.7643 | 7.49E-10 | 0.2156 |
| R23 | 70.01 | 299.3 | 4.832 | 526.50 | 0.263 | 1.649 | 6 | 0 | 663.466 | 5.68E-10 | 0.4025 |
| R236EA | 152.04 | 412.4 | 3.420 | 565.00 | 0.369 | 1.129 | 6 | 0 | 858.7129 | 7.37E-10 | 0.1638 |
| R236FA | 152.04 | 398.1 | 3.200 | 551.29 | 0.377 | 1.982 | 6 | 0 | 825.2305 | 7.47E-10 | 0.2876 |
| R245CA | 134.05 | 447.6 | 3.941 | 525.47 | 0.355 | 1.74 | 6 | 0 | 939.1389 | 7.19E-10 | 0.2507 |
| R245FA | 134.05 | 427.0 | 3.651 | 519.44 | 0.378 | 1.549 | 6 | 0 | 884.5704 | 7.32E-10 | 0.2238 |
| R32 | 52.02 | 351.3 | 5.782 | 424.00 | 0.277 | 1.978 | 6 | 0 | 772.5707 | 5.68E-10 | 0.4474 |
| R365MFC | 148.07 | 460.0 | 3.266 | 473.84 | 0.377 | 3.807 | 6 | 0 | 958.6759 | 7.85E-10 | 0.4761 |
| R40 | 50.49 | 416.3 | 6.690 | 363.22 | 0.150 | 1.871 | 6 | 0 | 996.9295 | 5.44E-10 | 0.3977 |
| R41 | 34.03 | 317.3 | 5.897 | 316.51 | 0.200 | 1.851 | 6 | 0 | 734.055 | 5.30E-10 | 0.4765 |
| RC318 | 200.04 | 388.4 | 2.778 | 620.00 | 0.355 | 0 | 3 | 0 | 814.7673 | 7.71E-10 | 0.0000 |
| RE143A | 100.04 | 377.9 | 3.635 | 465.00 | 0.289 | 2.48 | 6 | 0 | 825.3715 | 6.83E-10 | 0.4117 |
| RE245CB2 | 150.05 | 406.8 | 2.886 | 499.51 | 0.354 | 2.785 | 6 | 0 | 855.3804 | 7.74E-10 | 0.3763 |
| RE245FA2 | 150.05 | 444.9 | 3.433 | 515.00 | 0.387 | 1.631 | 6 | 0 | 917.5439 | 7.60E-10 | 0.2186 |
| RE347MCC | 200.05 | 437.7 | 2.478 | 528.14 | 0.403 | 3.13 | 6 | 0 | 896.2612 | 8.49E-10 | 0.3595 |
| SF6 | 146.06 | 318.7 | 3.755 | 742.30 | 0.218 | 0 | 3 | 0 | 727.3865 | 6.20E-10 | 0.0000 |
| SO2 | 64.06 | 430.6 | 7.887 | 517.51 | 0.256 | 1.6 | 6 | 0 | 959.5502 | 5.44E-10 | 0.3467 |
| T2BUTENE | 56.11 | 428.6 | 4.027 | 236.38 | 0.210 | 0 | 2 | 0 | 983.4778 | 6.66E-10 | 0.0000 |
| TOLUENE | 92.14 | 591.8 | 4.126 | 291.99 | 0.266 | 0.36 | 4 | 0 | 1309.194 | 7.52E-10 | 0.0411 |
| VINYLCHLORIDE | 62.50 | 425.0 | 5.590 | 351.24 | 0.161 | 1.451 | 6 | 0 | 1009.385 | 5.84E-10 | 0.2755 |
| WATER | 18.02 | 647.1 | 22.064 | 322.00 | 0.344 | 1.855 | 7 | 0 | 1537.06 | 4.09E-10 | 0.4874 |
| XENON | 131.29 | 289.7 | 5.842 | 1102.86 | 0.004 | 0 | 0 | 0 | 783.1014 | 4.73E-10 | 0.0000 |

**2. Generalized Corresponding-State Correlations for the Second Virial Coefficient of Xu et al.**[54,55]

2.1. Definition of the reduced second virial coefficient

The second virial coefficient is correlated in reduced form as

|  |  | () |
| --- | --- | --- |

where *B* is the second virial coefficient, *p*c is the critical pressure, *T*c is the critical temperature, and *R*=8.3144626 J mol−1 K−1 is the universal gas constant. The reduced temperature is defined as

|  |  | () |
| --- | --- | --- |

In the original correlations, *B* is expressed in cm3 mol−1, *p*c in MPa, *T* and *T*c in K. The general corresponding-state form is

|  |  | () |
| --- | --- | --- |

where *f*(0) is the simple spherical contribution, *ωf*(1) is the non-sphericity correction, and *f*(2) is the polarity or association correction. The acentric factor is defined as

|  |  | () |
| --- | --- | --- |

The reduced dipole moment is defined as

|  |  | () |
| --- | --- | --- |

where *μ* is the dipole moment in Debye.

2.2. Simple spherical term

For simple spherical fluids, the second virial coefficient is represented only by the spherical term:

|  |  | () |
| --- | --- | --- |

with

|  |  | () |
| --- | --- | --- |

This term is used as the base contribution for all other fluid classes. In the generalized framework, it is associated with simple fluids such as Ne, Ar, Kr, and Xe, although a separate high-accuracy correlation for Ne is also provided.

2.3. Nonpolar fluids

For nonpolar fluids, the acentric factor is used to account for molecular non-sphericity:

|  |  | () |
| --- | --- | --- |

where

|  |  | () |
| --- | --- | --- |

This term corrects the simple spherical-fluid behavior for non-spherical nonpolar molecules.

2.4. Non-associating polar fluids

For non-associating polar fluids, the reduced second virial coefficient is written as

|  |  | () |
| --- | --- | --- |

with

|  |  | () |
| --- | --- | --- |

The parameter *a* is expressed as a function of the reduced dipole moment μr\mu_rμr​.

For haloalkanes,

|  |  | () |
| --- | --- | --- |

For other non-associating polar fluids, including ketones, aldehydes, ethers, and related polar compounds,

|  |  | () |
| --- | --- | --- |

2.5. Associated polar fluids

For associating fluids, hydrogen-bonding effects are described through a separate associated polar term. The general form is

|  |  | () |
| --- | --- | --- |

where *ϑ*(*T*r) depends on the fluid family.

For alcohols,

|  |  | () |
| --- | --- | --- |

For amines,

|  |  | () |
| --- | --- | --- |

For ammonia,

|  |  | () |
| --- | --- | --- |

For water, the associated polar correction is

|  |  | () |
| --- | --- | --- |

2.6. Quantum fluids

For quantum fluids, the ordinary acentric-factor correction is not used. Instead, a quantum correction based on the reduced de Broglie wavelength is added to the simple spherical term:

|  |  | () |
| --- | --- | --- |

where

|  |  | () |
| --- | --- | --- |

Here, *h* is Planck’s constant, *m* is the molecular mass, and *σ* and *ε* are intermolecular potential parameters.

The quantum correction is

|  |  | () |
| --- | --- | --- |

This formulation is applied to typical quantum fluids such as H2, D2, T2, HD, DT, 3He, and 4He. This generalized quantum term is applicable for quantum fluids except Ne for *T*r>0.33.

2.7. Fluid-specific correlations

For some fluids, specific correlations are provided for higher accuracy. For helium-4,

|  |  | () |
| --- | --- | --- |

For helium-3,

|  |  | () |
| --- | --- | --- |

For neon,

|  |  | () |
| --- | --- | --- |

And for water,

|  |  | () |
| --- | --- | --- |

**3. Python package for dilute-gas viscosity calculation**

1. DiluteGasCal_python.py: the python code for dilute gas viscosity calculation based on this work.

2. Fluid_Constants_Group_B.csv: fluid constants and Boyle temperature and length.

**Reference**

1. M. L. Huber, (2018).

2. P. D. Neufeld, A. R. Janzen, and R. A. Aziz, J. Chem. Phys. **57**, 1100 (1972).

3. T. H. Chung, M. Ajlan, L. L. Lee, and K. E. Starling, Ind. Eng. Chem. Res. **27**, 671 (1988).

4. S. A. Monogenidou, M. J. Assael, and M. L. Huber, J. Phys. Chem. Ref. Data **47**, (2018).

5. J. Millat, J. H. Dymond, C. A. N. de Castro, and International Union of Pure and Applied Chemistry, editors , *Transport Properties of Fluids: Their Correlation, Prediction and Estimation* (IUPAC : Cambridge University Press, Cambridge ; New York, 1996).

6. A. Fenghour, W. A. Wakeham, V. Vesovic, J. T. R. Watson, J. Millat, and E. Vogel, J. Phys. Chem. Ref. Data **24**, 1649 (1995).

7. E. Vogel, C. Küchenmeister, E. Bich, and A. Laesecke, J. Phys. Chem. Ref. Data **27**, 947 (1998).

8. E. W. Lemmon and R. T. Jacobsen, Int. J. Thermophys. **25**, 21 (2004).

9. R. A. Aziz, J. Chem. Phys. **99**, 4518 (1993).

10. S. Avgeri, M. J. Assael, M. L. Huber, and R. A. Perkins, J. Phys. Chem. Ref. Data **43**, 033103 (2014).

11. M. J. Assael, E. K. Mihailidou, M. L. Huber, and R. A. Perkins, J. Phys. Chem. Ref. Data **41**, 043102 (2012).

12. S. Herrmann and E. Vogel, J. Phys. Chem. Ref. Data **47**, 013104 (2018).

13. A. Laesecke and C. D. Muzny, J. Phys. Chem. Ref. Data **46**, 013107 (2017).

14. J. Luettmer‐Strathmann, J. V. Sengers, and G. A. Olchowy, J. Chem. Phys. **103**, 7482 (1995).

15. U. Tariq, A. R. B. Jusoh, N. Riesco, and V. Vesovic, J. Phys. Chem. Ref. Data **43**, 033101 (2014).

16. E. Vogel, B. Holdt, and T. Strehlow, Phys. Stat. Mech. Its Appl. **148**, 46 (1988).

17. M. L. Huber, A. Laesecke, and H. W. Xiang, Fluid Phase Equilibria **224**, 263 (2004).

18. C. D. Muzny, M. L. Huber, and A. F. Kazakov, J. Chem. Eng. Data **58**, 969 (2013).

19. H. Behnejad and M. S. Miralinaghi, J. Mol. Liq. **113**, 143 (2004).

20. X. Meng, J. Zhang, J. Wu, and Z. Liu, J. Chem. Eng. Data **57**, 988 (2012).

21. M. L. Huber, A. Laesecke, and R. Perkins, Energy Fuels **18**, 968 (2004).

22. E. Vogel, R. Span, and S. Herrmann, J. Phys. Chem. Ref. Data **44**, (2015).

23. S. B. Kiselev, J. F. Ely, I. M. Abdulagatov, and M. L. Huber, Ind. Eng. Chem. Res. **44**, 6916 (2005).

24. X. Y. Meng, F. L. Cao, J. T. Wu, and V. Vesovic, J. Phys. Chem. Ref. Data **46**, 013101 (2017).

25. P. M. Holland, B. E. Eaton, and H. J. M. Hanley, J. Phys. Chem. Ref. Data **12**, 917 (1983).

26. M. J. Assael, S. A. Monogenidou, M. L. Huber, R. A. Perkins, and J. V. Sengers, J. Phys. Chem. Ref. Data **50**, (2021).

27. J. K. Bhattacharjee, R. A. Ferrell, R. S. Basu, and J. V. Sengers, Phys. Rev. A **24**, 1469 (1981).

28. V. D. Arp and R. D. McCarty, *Thermophysical Properties of Helium-4 from 0.8 to 1500 K with Pressures to 2000 MPa* (1989).

29. E. K. Michailidou, M. J. Assael, M. L. Huber, I. M. Abdulagatov, and R. A. Perkins, J. Phys. Chem. Ref. Data **43**, 023103 (2014).

30. E. Vogel and B. Holdt, High Temp-High Press. **23**, 473 (1991).

31. X. Y. Meng, Y. K. Sun, F. L. Cao, J. T. Wu, and V. Vesovic, J. Phys. Chem. Ref. Data **47**, 033102 (2018).

32. E. K. Michailidou, M. J. Assael, M. L. Huber, and R. A. Perkins, J. Phys. Chem. Ref. Data **42**, 033104 (2013).

33. K. A. G. Schmidt, S. E. Quiñones-Cisneros, J. J. Carroll, and B. Kvamme, Energy Fuels **22**, 3424 (2008).

34. E. Vogel, C. Küchenmeister, and E. Bich, Int. J. Thermophys. **21**, 343 (2000).

35. C. Küchenmeister and E. Vogel, Int. J. Thermophys. **21**, 329 (2000).

36. S. G. Sotiriadou, K. D. Antoniadis, M. J. Assael, V. Martinek, and M. L. Huber, Int. J. Thermophys. **47**, 18 (2025).

37. H. W. Xiang, A. Laesecke, and M. L. Huber, J. Phys. Chem. Ref. Data **35**, 1597 (2006).

38. F. L. Cao, X. Y. Meng, J. T. Wu, and V. Vesovic, J. Phys. Chem. Ref. Data **45**, 013103 (2016).

39. F. L. Cao, X. Y. Meng, J. T. Wu, and V. Vesovic, J. Phys. Chem. Ref. Data **45**, 023102 (2016).

40. E. Vogel and S. Herrmann, J. Phys. Chem. Ref. Data **45**, 043103 (2016).

41. B. Balogun, N. Riesco, and V. Vesovic, J. Phys. Chem. Ref. Data **44**, 013103 (2015).

42. S. A. Klein, M. O. McLinden, and A. Laesecke, Int. J. Refrig. **20**, 208 (1997).

43. J. Wilhelm and E. Vogel, Fluid Phase Equilibria **125**, 257 (1996).

44. Y. Tanaka and T. Sotani, Int. J. Thermophys. **17**, 293 (1996).

45. M. L. Huber and M. J. Assael, Int. J. Refrig. **71**, 39 (2016).

46. M. L. Huber and A. Laesecke, Ind. Eng. Chem. Res. **45**, 4447 (2006).

47. M. L. Huber, A. Laesecke, and R. A. Perkins, Ind. Eng. Chem. Res. **42**, 3163 (2003).

48. Z. Shan, S. G. Penoncello, and R. T. Jacobsen, *A Generalized Model for Viscosity and Thermal Conductivity of Trifluoromethane (R-23)* (American Society of Heating, Refrigerating and Air-Conditioning Engineers, Inc., Atlanta, GA (US), 2000).

49. R. A. Perkins, M. L. Huber, and M. J. Assael, J. Chem. Eng. Data **61**, 3286 (2016).

50. S. E. Quiñones-Cisneros, M. L. Huber, and U. K. Deiters, J. Phys. Chem. Ref. Data **41**, 023102 (2012).

51. S. Avgeri, M. J. Assael, M. L. Huber, and R. A. Perkins, J. Phys. Chem. Ref. Data **44**, 033101 (2015).

52. M. J. Assael, T. B. Papalas, and M. L. Huber, J. Phys. Chem. Ref. Data **46**, 033103 (2017).

53. M. L. Huber, R. A. Perkins, A. Laesecke, D. G. Friend, J. V. Sengers, M. J. Assael, I. N. Metaxa, E. Vogel, R. Mareš, and K. Miyagawa, J. Phys. Chem. Ref. Data **38**, 101 (2009).

54. L. Xu, H.-T. Liu, Z. Yang, and Y.-Y. Duan, Fluid Phase Equilibria **547**, 113133 (2021).

55. L. Xu, Y.-Y. Duan, H.-T. Liu, and Z. Yang, Fluid Phase Equilibria **539**, 113032 (2021).

1. Corresponding author. Yuanyuan Duan. Email address: [yyduan@tsinghua.edu.cn](mailto:yyduan@tsinghua.edu.cn). ORCID ID: <https://orcid.org/0000-0002-4117-7545>. [↑](#footnote-ref-1)
2. Corresponding author. Xiaoxian Yang. Email address: [xiaoxian.yang@mb.tu-chemnitz.de](mailto:xiaoxian.yang@mb.tu-chemnitz.de). ORCID ID: [https://orcid.org/0000-0003-4655-3156](https://orcid.org/0000-0001-8120-5646). [↑](#footnote-ref-2)
